# Supplementary material for: Precipitation δ 18 O on the Himalaya–Tibet orogeny and its relationship to surface elevation
Source: Copernicus journal article supplement (doi:10.5194/cp-15-169-2019), 2019-01-29
Supplement: Supplementary file 1 [file cp-15-169-2019-supplement.pdf]

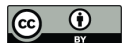

## *Supplement of*

# **Precipitation $\delta^{18}\text{O}$ on the Himalaya–Tibet orogeny and its relationship to surface elevation**

**Hong Shen and Christopher J. Poulsen**

*Correspondence to:* Hong Shen ([hdshen@umich.edu](mailto:hdshen@umich.edu))

The copyright of individual parts of the supplement might differ from the CC BY 4.0 License.

**Table S1. Classification of sites from which  $\delta^{18}\text{O}$  records have been used to infer paleoaltimetry (see Section 4.2 and Figure 15 for more explanation).**

5

| Site                                                                                                                               | Latitude ( $^{\circ}$ N) | Longitude ( $^{\circ}$ E) | Paleoaltimetry Studies  |
|------------------------------------------------------------------------------------------------------------------------------------|--------------------------|---------------------------|-------------------------|
| Sites that are judged appropriate for $\delta^{18}\text{O}$ -paleoaltimetry under high-elevation scenarios (black dots in Fig. 15) |                          |                           |                         |
| Gyirong                                                                                                                            | 28.7                     | 85.3                      | Wang et al. 1996        |
| Hongtupo                                                                                                                           | 31.4                     | 103.5                     | Xu et al. 2016          |
| Linzhou Basin                                                                                                                      | 30.0                     | 91.2                      | Ding et al. 2014        |
| Markam Basin                                                                                                                       | 29.7                     | 98.5                      | Li et al. 2015          |
| Mount Everest                                                                                                                      | 28.3                     | 87.6                      | Rowley et al. 2001      |
| Namling-Oiyug Basin                                                                                                                | 29.7                     | 89.5                      | Currie et al. 2005      |
| Penbo Basin                                                                                                                        | 29.8                     | 91.2                      | Ingalls et al. 2017     |
| Sites in the southernmost Himalayas where elevations are too low (red dots in Fig. 15)                                             |                          |                           |                         |
| Chake Basin                                                                                                                        | 23.8                     | 103.1                     | Hoke et al. 2014        |
| Eryuan                                                                                                                             | 26.2                     | 99.8                      | Hoke et al. 2014        |
| Jianchuan Basin                                                                                                                    | 26.6                     | 99.8                      | Hoke et al. 2014        |
| Lanping                                                                                                                            | 26.5                     | 99.4                      | Hoke et al. 2014        |
| Luhe                                                                                                                               | 25.2                     | 101.3                     | Hoke et al. 2014        |
| Nepal Siwaliks                                                                                                                     | 27.4                     | 82.8                      | Quade et al. 1995       |
| Xiaolongtan Basin                                                                                                                  | 23.6                     | 103.2                     | Li et al. 2015          |
| Yanyuan                                                                                                                            | 27.5                     | 101.5                     | Hoke et al. 2014        |
| Sites in northern Tibet (orange dots in Fig. 15)                                                                                   |                          |                           |                         |
| Aertashi                                                                                                                           | 38.0                     | 75.6                      | Kent-Corson et al. 2009 |
| Ganchaigou                                                                                                                         | 37.7                     | 91.0                      | Kent-Corson et al. 2009 |
| Hexi Corridor                                                                                                                      | 39.5                     | 97.5                      | Kent-Corson et al. 2009 |
| Huaitoutala                                                                                                                        | 37.3                     | 96.7                      | Zhuang et al. 2011      |
| Huatugou                                                                                                                           | 38.3                     | 91.8                      | Li et al. 2016          |
| Janggalsay                                                                                                                         | 38.2                     | 86.6                      | Kent-Corson et al. 2009 |
| Lake Mahai                                                                                                                         | 37.7                     | 94.2                      | Kent-Corson et al. 2009 |

|             |      |      |                         |
|-------------|------|------|-------------------------|
| Lao Mangnai | 36.9 | 92.0 | Kent-Corson et al. 2009 |
| Lenghu      | 37.8 | 93.4 | Kent-Corson et al. 2009 |
| Lulehe      | 37.5 | 95.1 | Kent-Corson et al. 2009 |
| Miran River | 39.0 | 88.9 | Kent-Corson et al. 2009 |
| Oytag       | 39.0 | 75.5 | Bershaw et al. 2011     |
| Puska       | 37.1 | 78.6 | Kent-Corson et al. 2009 |
| Xiao Qaidam | 37.0 | 94.9 | Kent-Corson et al. 2009 |
| Xorkol      | 39.0 | 91.9 | Kent-Corson et al. 2009 |

Sites in the western or transitional regions (blue dots in Fig. 15)

|                   |      |      |                      |
|-------------------|------|------|----------------------|
| India Siwaliks    | 30.4 | 77.6 | Ghosh et al. 2004    |
| India Siwaliks    | 30.3 | 77.6 | Sanyal et al. 2005   |
| Kailas Basin      | 31.2 | 81.0 | DeCelles et al. 2011 |
| Pakistan Siwaliks | 33.4 | 73.1 | Quade et al. 1995    |
| Thakkhola         | 28.7 | 83.5 | Garzione et al. 2000 |
| Thakkhola-Tetang  | 28.7 | 83.5 | Garzione et al. 2000 |
| Zhada Basin       | 31.5 | 79.8 | Saylor et al. 2009   |

Sites in central Tibet (green dots in Fig. 15)

|                        |      |       |                        |
|------------------------|------|-------|------------------------|
| Chaoyang-Hoh Xil Basin | 35.5 | 87.4  | Li et al. 2018         |
| Deyu-Hoh Xil Basin     | 35.7 | 87.4  | Li et al. 2018         |
| Erdagou-Hoh Xil Basin  | 34.5 | 92.7  | Li et al. 2018         |
| Erdaogou-Hoh Xil Basin | 35.0 | 92.3  | Li et al. 2018         |
| Gerze Basin            | 31.9 | 85.1  | Wei et al. 2016        |
| Hoh Xil Basin          | 34.6 | 93.0  | Cyr et al. 2005        |
| Kunlun Pass Basin      | 35.6 | 94.1  | Wang et al. 2008       |
| Linxia Basin           | 35.7 | 103.1 | Dettman et al. 2003    |
| Lunpola Basin          | 32.1 | 89.8  | Rowley and Currie 2006 |
| Nima Basin             | 31.8 | 87.5  | DeCelles et al. 2011   |
| Xuehuan-Hoh Xil Basin  | 35.1 | 88.1  | Li et al. 2018         |
| Xunhua Basin           | 35.9 | 102.5 | Hough et al. 2010      |
| Zhuonai-Hoh Xil Basin  | 35.4 | 91.8  | Li et al. 2018         |

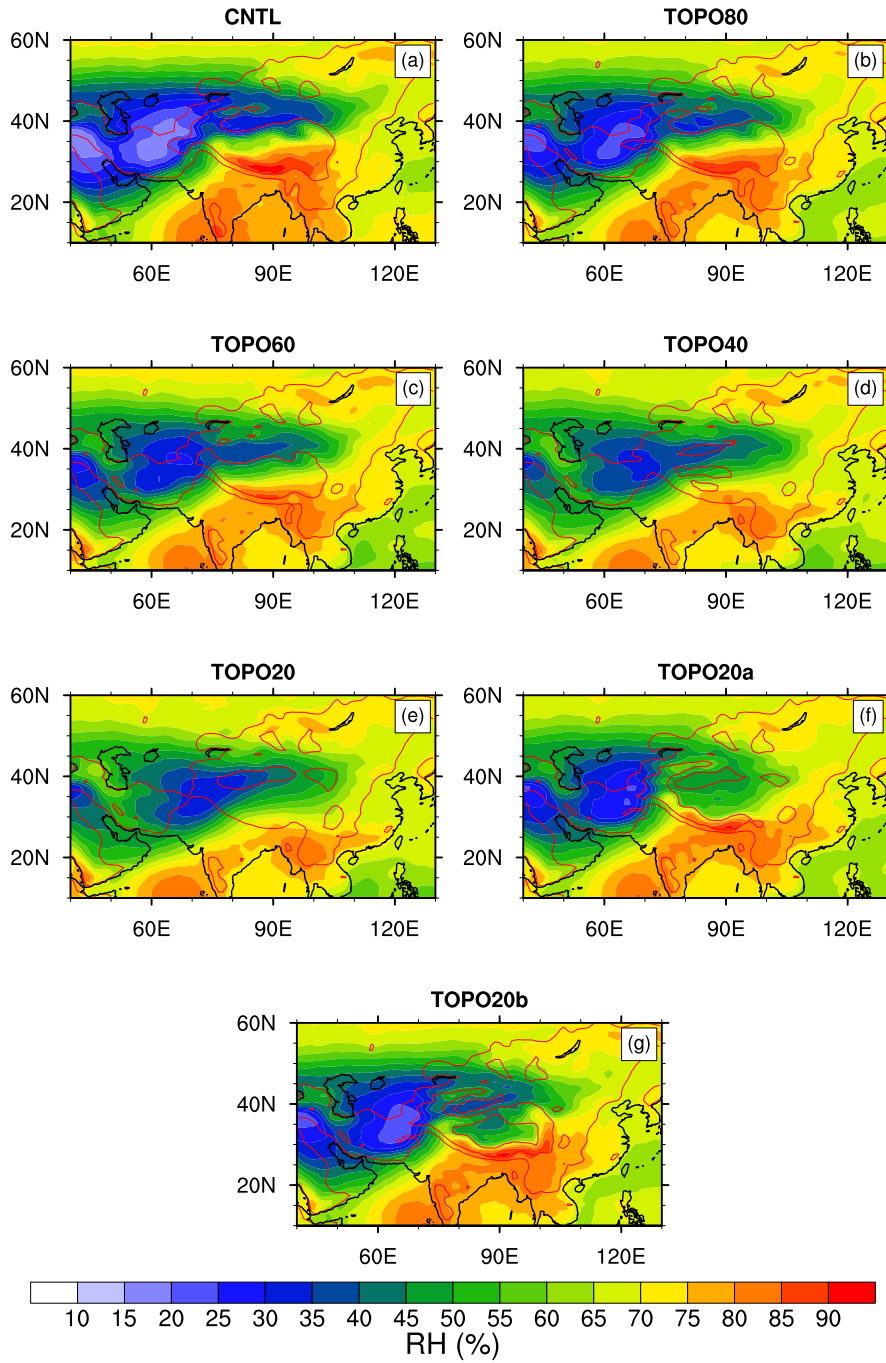

**Figure S1.** Summer (June-July-August) total-column-averaged relative humidity (shaded) for (a) CNTL (b) TOPO80, (c) TOPO60, (d) TOPO40, (e) TOPO20, (f) TOPO20a, and (g) TOPO20b cases. The red lines mark 500 m and 2000 m surface elevation contours in the Tibetan region.

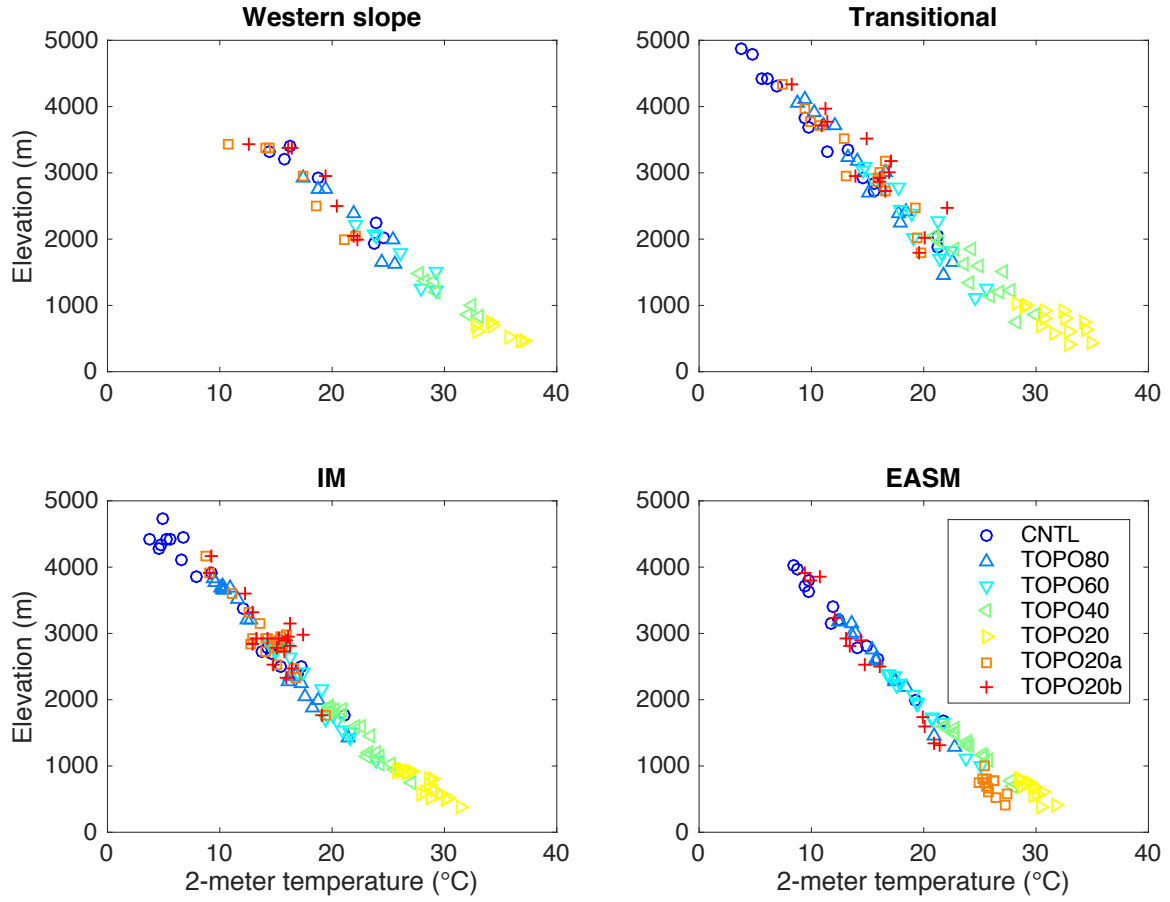

Figure S2. ECHAM5 simulated 2-meter air temperature (°C) versus elevation (m) for (a) western; (b) transitional; (c) IM region; and (d) EASM regions. The symbols indicate the elevation scenarios. Note that when calculating lapse rates using the data in these figures as described in section 3.1, we excluded TOPO40 and TOPO20 in the EASM region, and TOPO20 for the Himalayan and IM domains, since temperature exhibits little relationship with elevation in these low-relief cases.

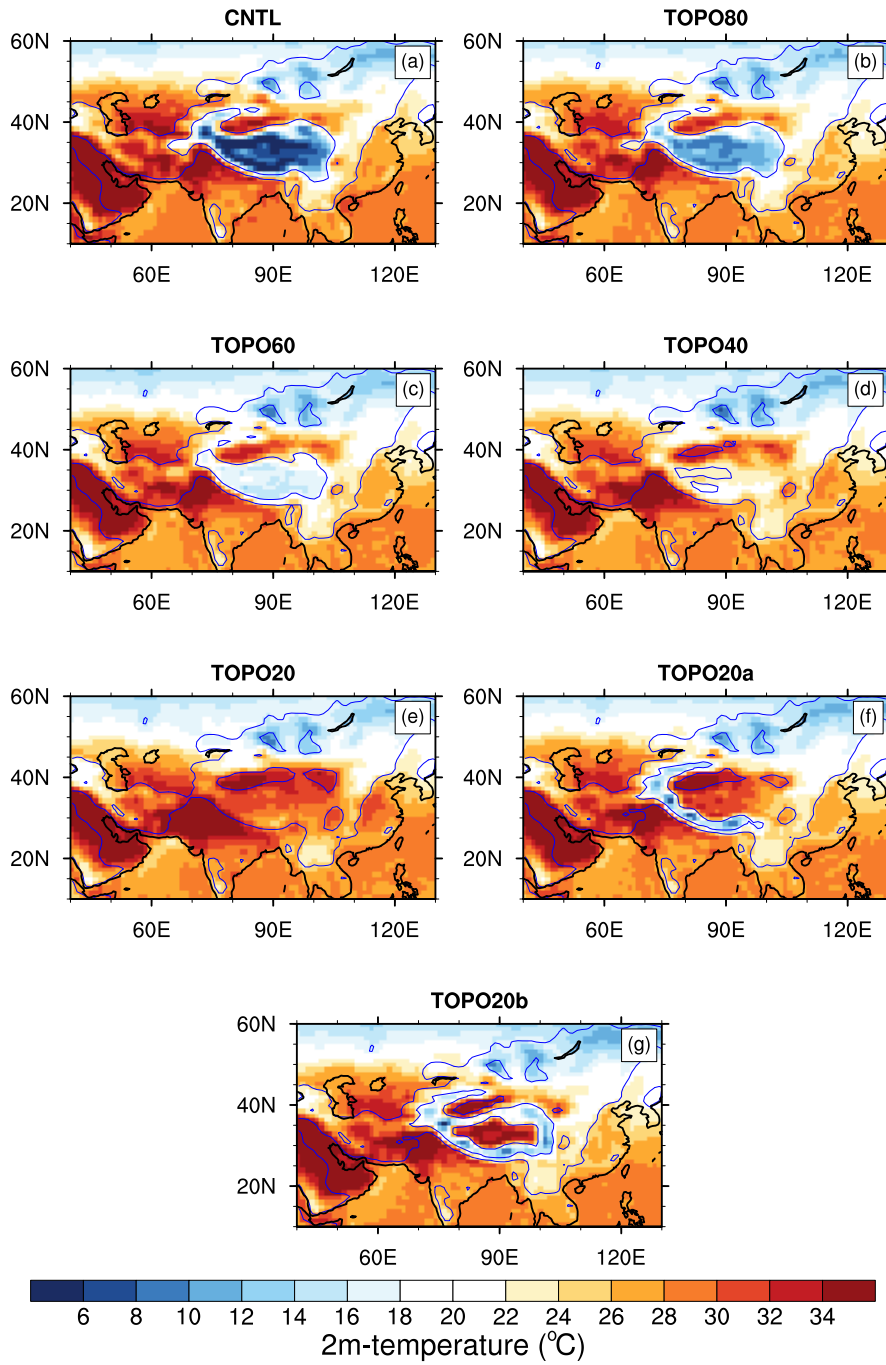

**Figure S3.** ECHAM5 June-July-August 2-meter near surface temperature (°C) for (a) CNTL, (b) TOPO80, (c) TOPO60, (d) TOPO40, (e) TOPO20, (f) TOPO20a, and (g) TOPO20b cases. Blue contour lines mark the 500 and 2000 m Tibetan surface elevations. Temperature decreases on the slope of the Himalayas but remains largely unchanged on the Tibetan Plateau.

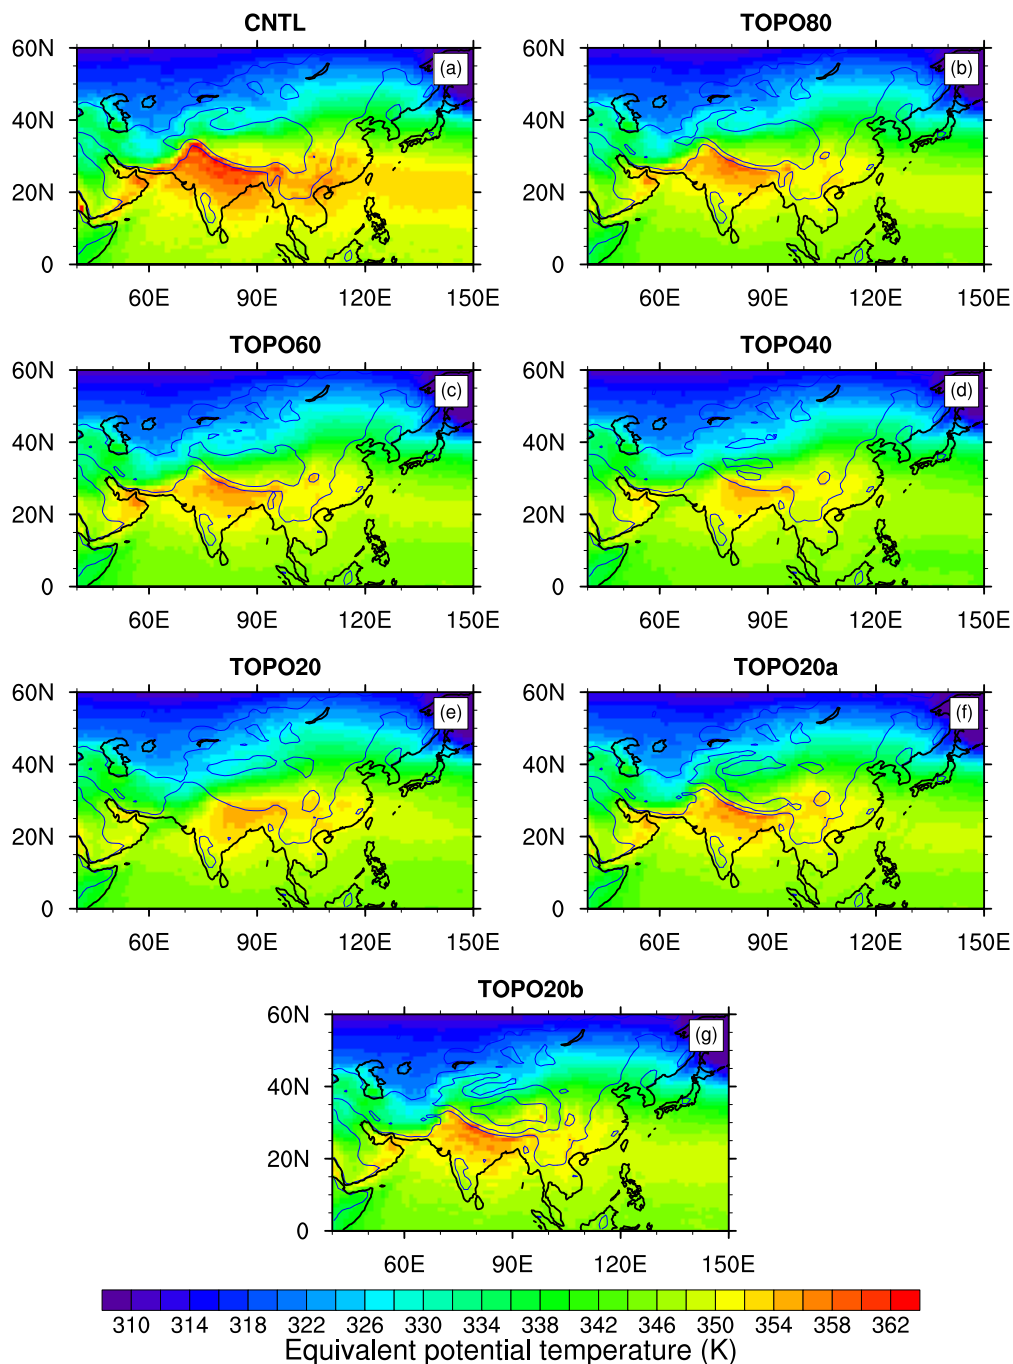

Figure S4. Equivalent potential temperature (K) at the 40 hPa sigma level for (a) CNTL, (b) TOPO80, (c) TOPO60, (d) TOPO40, (e) TOPO20, (f) TOPO20a, and (g) TOPO20b cases. Light blue contours mark 500 m and 2000 m surface elevation contours in the Tibetan reach for each case.

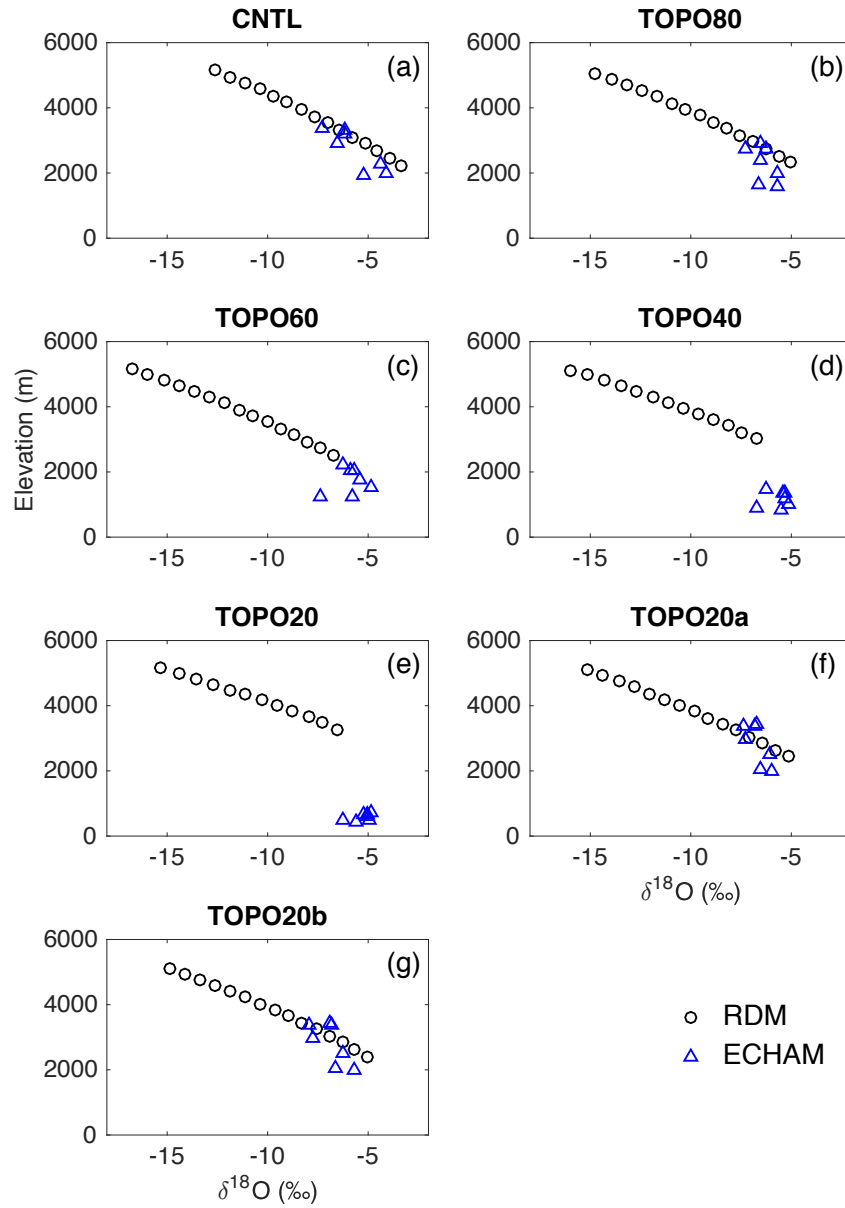

Figure S5. Monthly-precipitation-weighted ECHAM (blue triangle) and RDM (black circle)  $\delta^{18}\text{O}_p$  (‰) versus elevation (m) plot for the western part of the southern Himalayan flank for the cases (a) CNTL, (b) TOPO80, (c) TOPO60, (d) TOPO40, (e) TOPO20, (f) TOPO20a, and (g) TOPO20b.



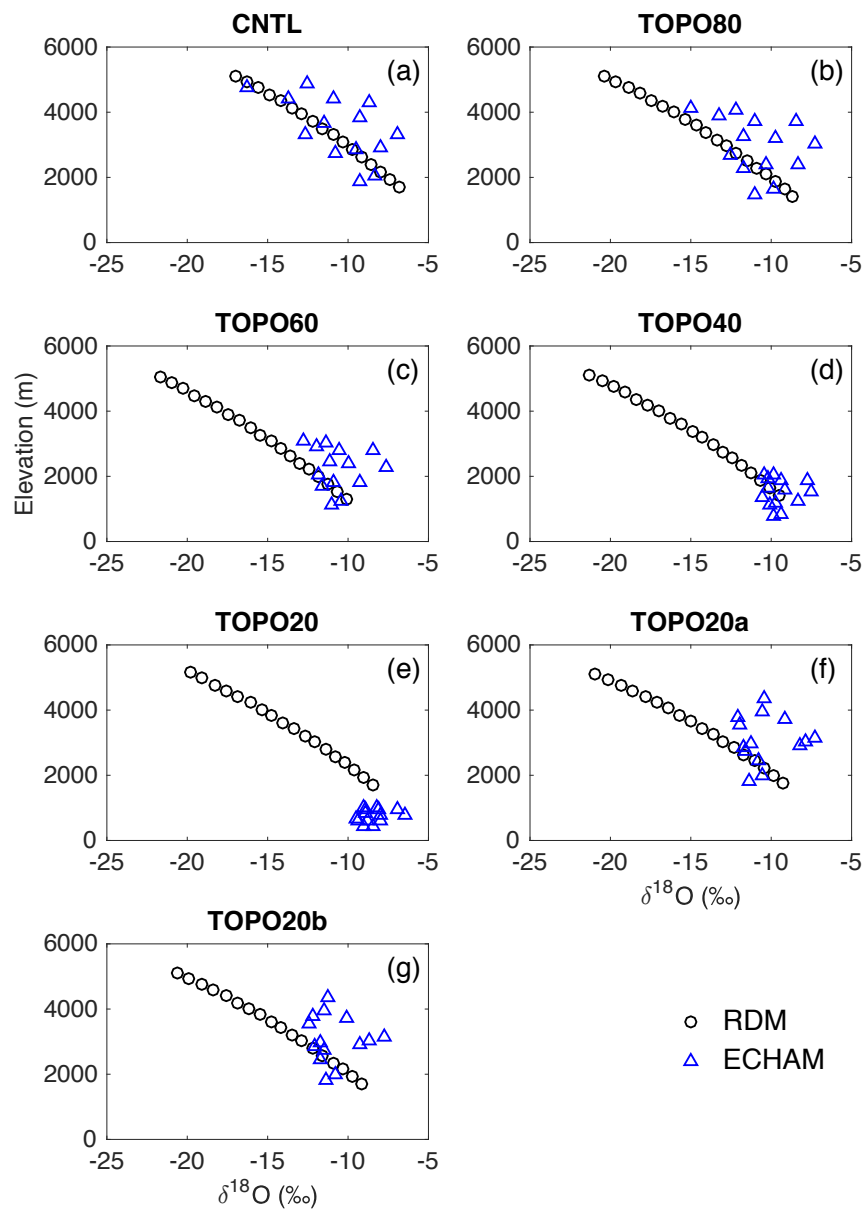

Figure S6. Same as figure S6 but for the transitional area between the western and the central part of the southern Himalayan flank.

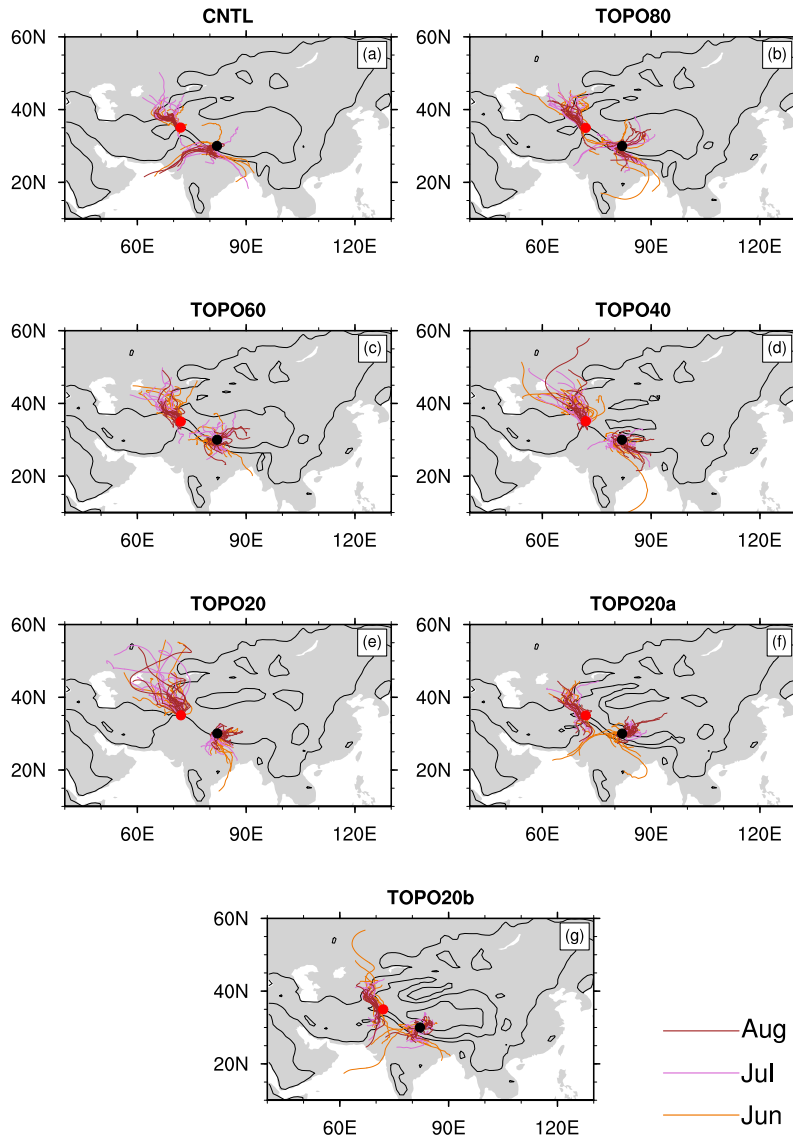

**Figure S7. Back trajectory calculations for air parcels originating from the western (35° N, 72° E, red filled circle) and transitional (30° N, 82° E, black filled circle) regions for (a) CNTL, (b) TOPO80, (c) TOPO60, (d) TOPO40, (e) TOPO20, (f) TOPO20a, and (g) TOPO20b cases. Black contour lines show 500 and 2000 m Tibetan surface elevations. In each case, 42 trajectories were estimated, one each for June, July, and August for 14 years. Line colors represent the month. As seen from this figure, moisture sources for the transitional region in high-elevation scenarios come from both the Bay of Bengal and the Arabian Sea. In comparison, the sources of the monsoonal regions come primary from the Bay of Bengal and northwest India (not shown).**

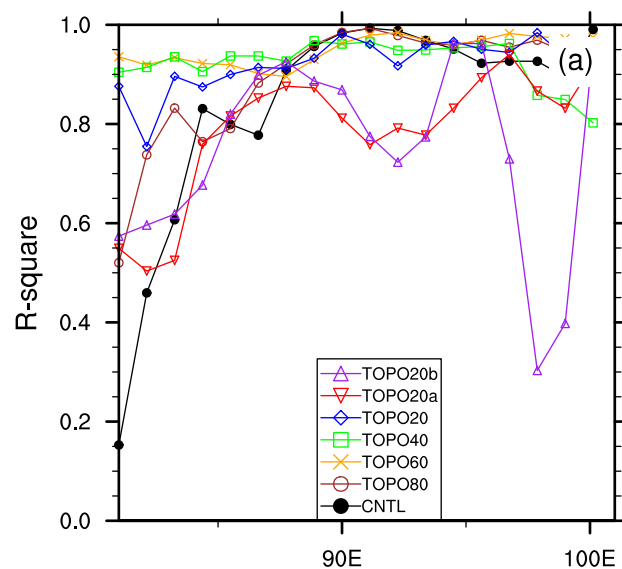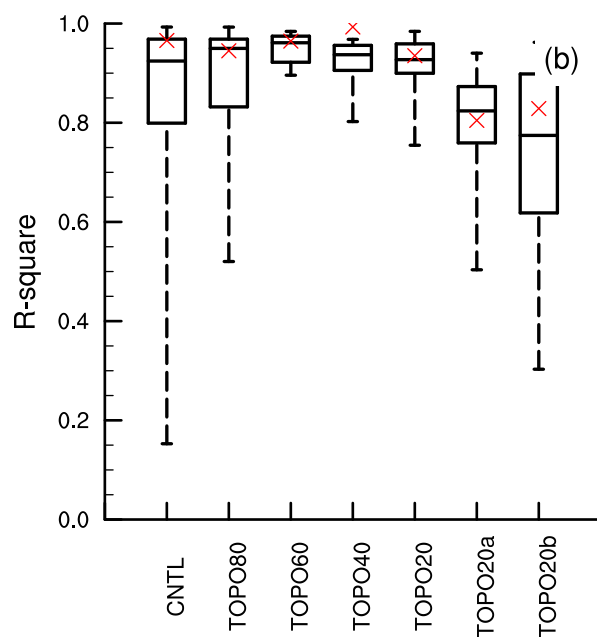

Figure S8. (a) The r-squared indicating goodness of fit of the regression in Fig 11. (b) Box plots showing minimum, maximum, median, and quartile values for (a). Red “x” represents the mean values for each scenario, calculated by regressing longitudinally averaged  $\delta^{18}\text{O}_p$  across the Tibetan Plateau to latitude.

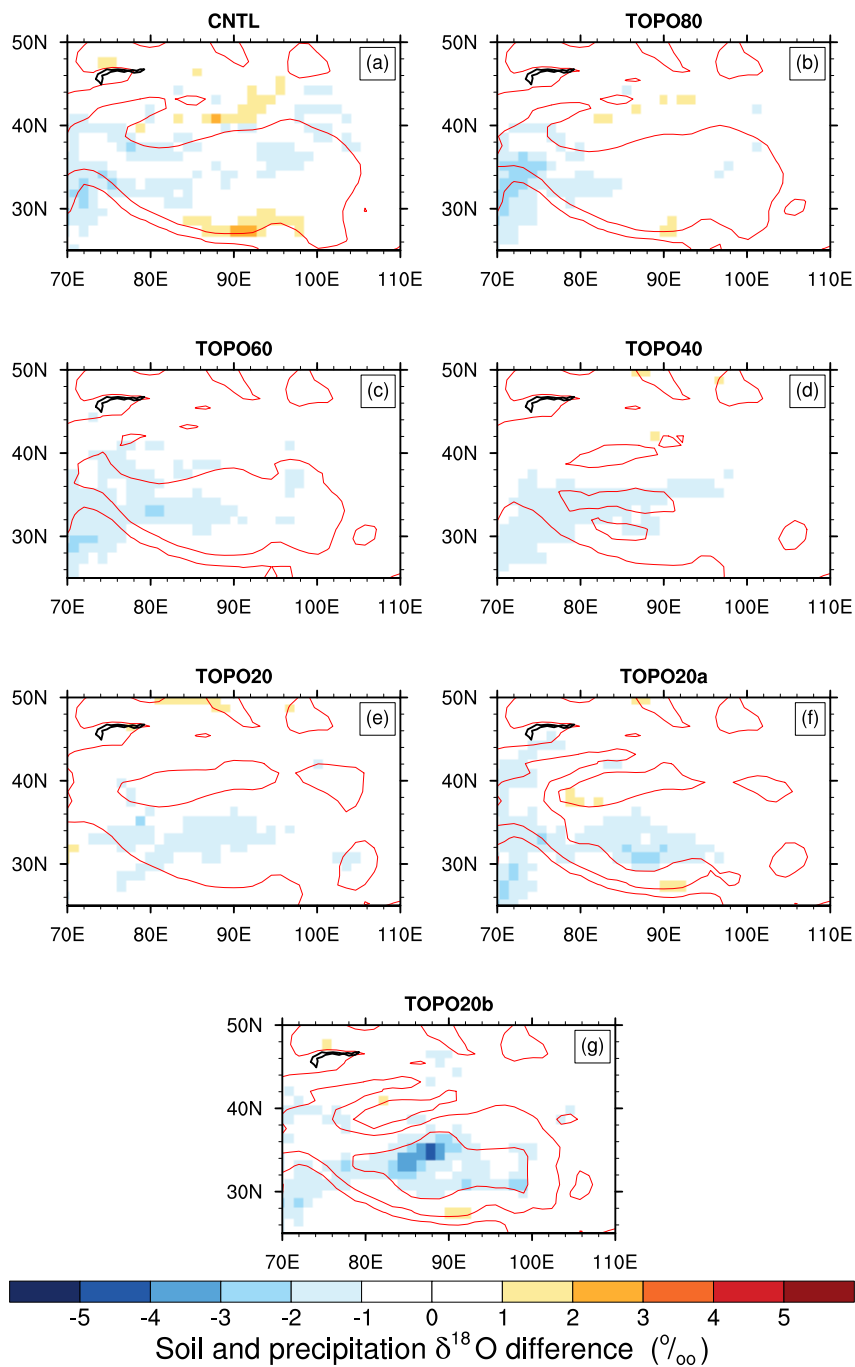

Figure S9. Simulated summer soil  $\delta^{18}\text{O}$  minus precipitation  $\delta^{18}\text{O}$  for each case (a) CNTL, (b) TOPO80, (c) TOPO60, (d) TOPO40, (e) TOPO20, (f) TOPO20a, and (g) TOPO20b. The soil and precipitation  $\delta^{18}\text{O}$  values are quite similar on the plateau, with soil  $\delta^{18}\text{O}$  slightly lower than that in precipitation.

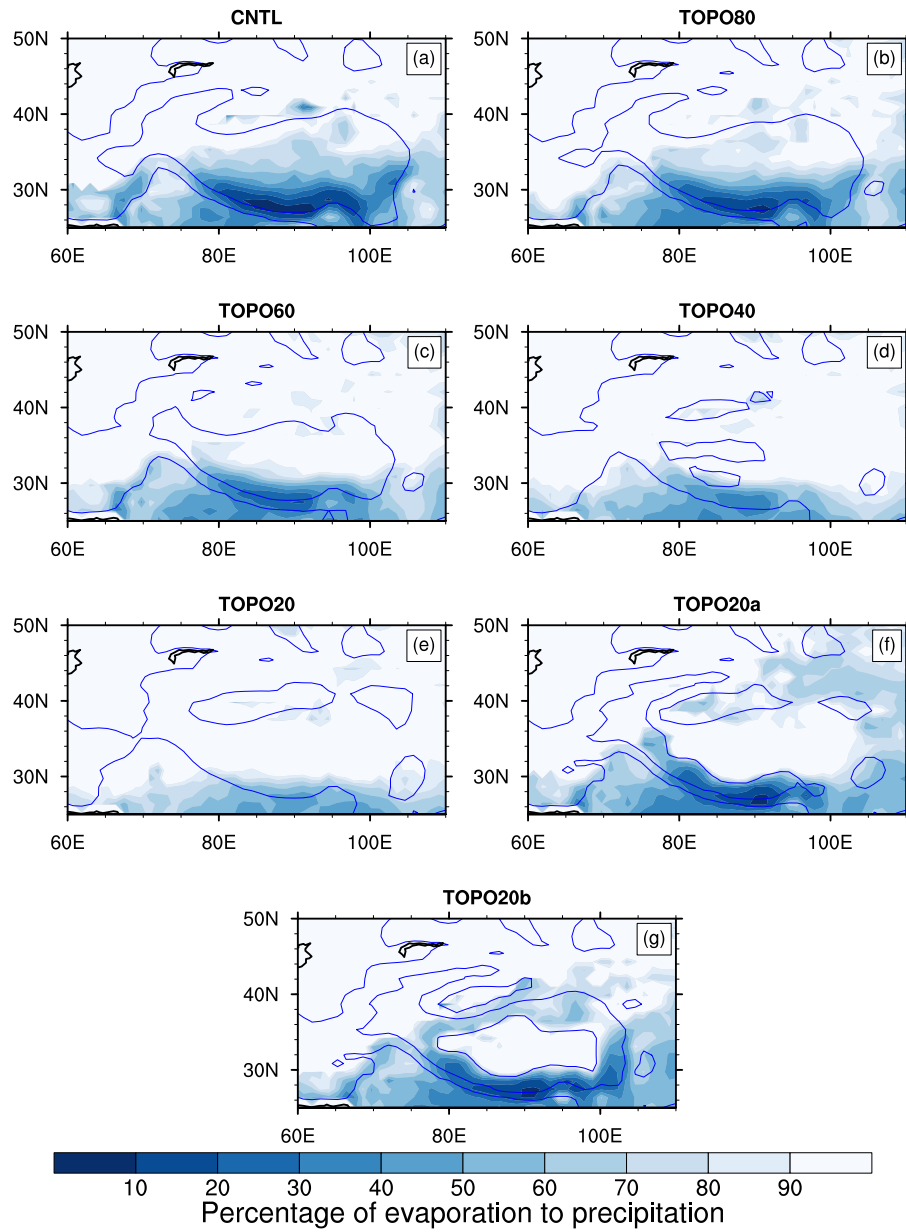

**Figure S10.** Fraction of summer land surface evaporation to total summer precipitation (shaded) for the (a) CNTL, (b) TOPO80, (c) TOPO60, (d) TOPO40, (e) TOPO20, (f) TOPO20a, and (g) TOPO20b cases. Blue contour lines mark the 500 and 2000 m Tibetan surface elevations. Larger portion of total precipitation is evaporated as the elevations are reduced.

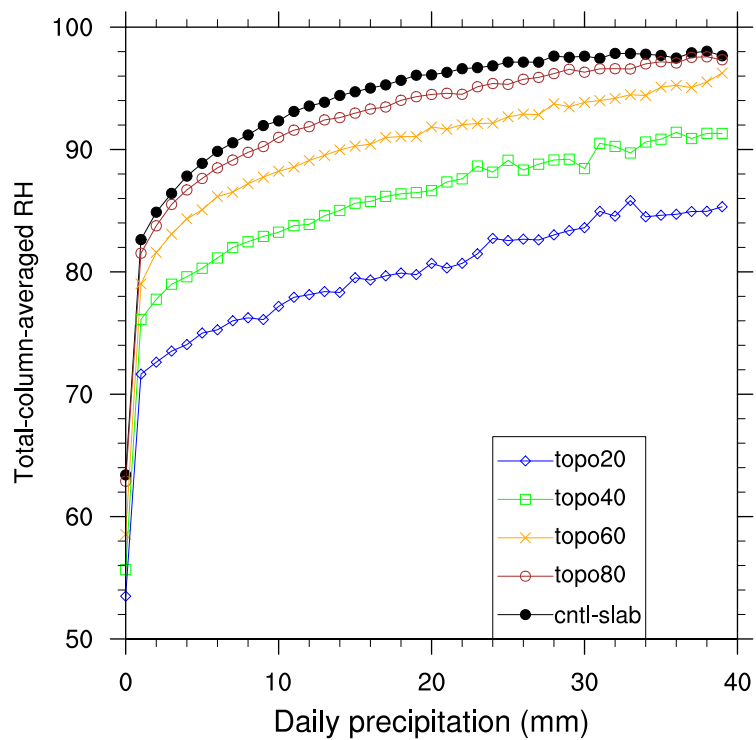

**Figure S11.** ECHAM5 total-column-averaged relative humidity (%) versus daily precipitation rate ( $\text{mm day}^{-1}$ ) for the Tibetan plateau. RH is higher in high-elevation scenarios than that in low-elevation scenarios at any given precipitation rate.

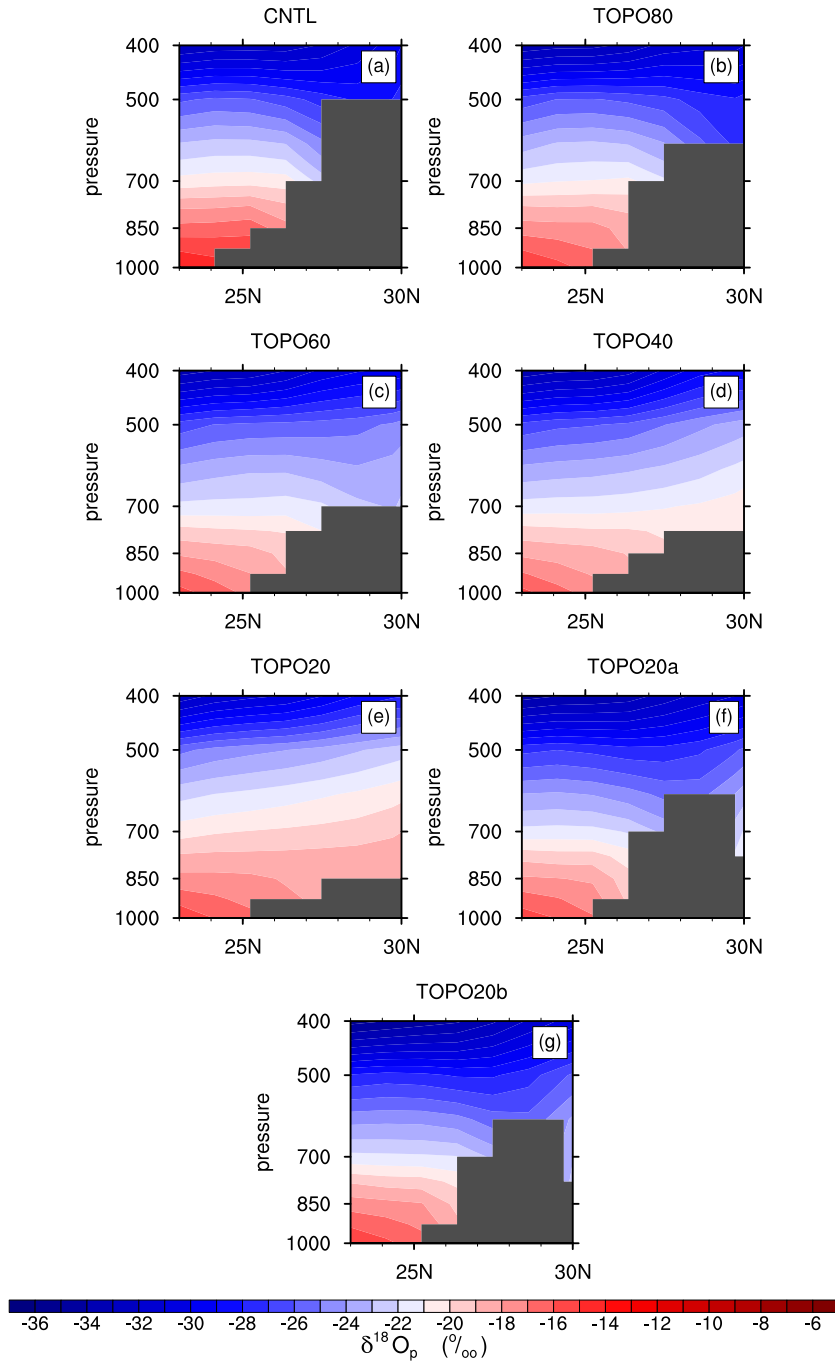

Figure S12. Vertical profile of air  $\delta^{18}\text{O}$  along the longitudinal section of  $90^\circ\text{E}$  for the (a) CNTL, (b) TOPO80, (c) TOPO60, (d) TOPO40, (e) TOPO20, (f) TOPO20a, and (g) TOPO20b cases. Gray shading denotes raised topography (i.e., mountains). The low-level ( $\sim 26^\circ\text{N}$ )  $\delta^{18}\text{O}_p$  is more depleted in lower-elevation scenarios than in CNTL. Abe, M., Kitoh, A., and Yasunari, T.: An Evolution of the Asian Summer Monsoon Associated with Mountain Uplift—Simulation with the MRI Atmosphere-Ocean Coupled GCM—, *Journal of the Meteorological Society of Japan. Ser. II*, 81, 909-933, doi:10.2151/jmsj.81.909, 2003.
